# Supplementary material
Source: Elsevier journal article supplement (https://www.sciencedirect.com/science/article/pii/S0870255117300203)

**Supplemental Figure 2.** Voltage map displaying the two ablation sets, one at the slow conducting isthmus area (the blue dot depicts the location where the atrial tachycardia was terminated) and the other at the intercaval line gap. The superimposed arrows represent the second flutter circuit. The yellow parallel lines represent the crista terminalis.


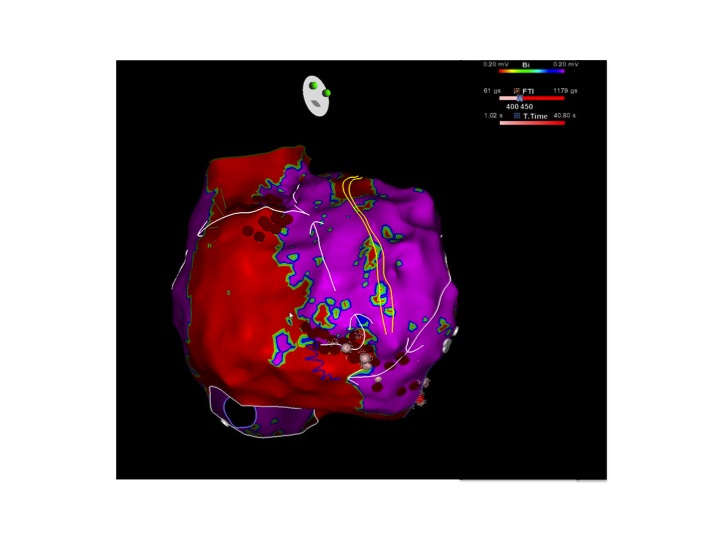

Supplement: mmc7 [file S0870255117300203:mmc7.docx]
